# Supplementary material
Source: publisher figshare collection journal article supplement (https://tandf.figshare.com/articles/dataset/_/20221913)
Supplement: Supplementary file 1 [file 1]

Supplementary File 2 – Interaction effects: stratified analysis of associations between a) previous mental health diagnosis; b) ethnic minority status c) international student and the three mental health indicators in 2019, 2020 and 2021 together with p-values for interaction.

| **Risk factor** | | | | **Depression** | | | **Anxiety** | | | **Low SWB** | | |
| --- | --- | --- | --- | --- | --- | --- | --- | --- | --- | --- | --- | --- |
| OR | 95% CI | Interaction P-value | OR | 95% CI | Interaction P-value | OR | 95% CI | Interaction P-value |
| **Previous mental health diagnosis** | | 2019 | | 3.66 | 3.00-4.33 | 0.039 | 3.35 | 2.76-3.95 | 0.217 | 3.16 | 2.60-3.73 | 0.008 |
| 2020 | | 2.89 | 2.42-3.36 | 3.18 | 2.65-3.70 | 2.21 | 1.85-2.57 |
| 2021 | | 2.68 | 2.22-3.14 | 2.73 | 2.26-3.19 | 2.32 | 1.92-2.72 |
| **Black, Asian or minority ethnicity** | | 2019 | | 1.88 | 1.40-2.37 | 0.005 | 1.31 | 0.98-1.65 | 0.316 | 1.51 | 1.13-1.89 | 0.506 |
| 2020 | | 1.56 | 1.25-1.88 | 1.20 | 0.94-1.46 | 1.33 | 1.07-1.59 |
| 2021 | | 1.08 | 0.83-1.33 | 1.01 | 0.77-1.25 | 1.23 | 0.95-1.52 |
| **International students** | | 2019 | | 1.08 | 0.73-1.42 | 0.641 | 1.17 | 0.79-1.55 | 0.760 | 1.20 | 0.82-1.58 | 0.132 |
| 2020 | | 0.92 | 0.71-1.13 | 1.06 | 0.81-1.32 | 0.82 | 0.64-0.99 |
| 2021 | | 1.06 | 0.76-1.36 | 0.99 | 0.71-1.28 | 0.88 | 0.63-1.13 |
|  |  | |  |

Note: All results for depression (Model 1), anxiety (Model 2) and low SWB (Model 3) control for each variable in Table 4 (gender, age, ethnicity, sexual orientation, course type, first generation, fee status and lifetime mental health diagnosis)
